# Supplementary material
Source: publisher figshare collection journal article supplement (https://karger.figshare.com/ndownloader/files/26848547)
Supplement: Supplementary file 1 [file 26848547]

**Supplementary Table 2**

Bacterial strains constructed in this study

| **Protein production** | **Description**  **(Strain/Vector/resistance)** | **Source** |
| --- | --- | --- |
| - | *K. sedentarius* MBB13 | This study |
| - | *E. coli* MG1655 | This study |
| WhiB1 | *M. smegmatis* / pMyNT-*whiB1* (Hygro-BR) | This study |
| WhiB2 | *M. smegmatis* / pMyNT-*whiB2* (Hygro-BR) | This study |
| WhiB1:σA-CTD | *E. coli* (BTH101) /  pKT25-*whiB1* and pUT18-*sigmaA* CTD (AmpR, StrR and KanR) | This study |
| WhiB1:σB | *E. coli* (BTH101) /  pKT25-*whiB1* and pUT18-*sigmaB* (AmpR, StrR and KanR) | This study |
| WhiB1:σH | *E. coli* (BTH101) /  pKT25-*whiB1* and pUT18-*sigmaH* (AmpR, StrR and KanR) | This study |
| WhiB1:σJ | *E. coli* (BTH101) /  pKT25-*whiB1* and pUT18-*sigmaJ* (AmpR, StrR and KanR) | This study |
| WhiB2:σA-CTD | *E. coli* (BTH101) /  pKT25-*whiB2* and pUT18-*sigmaA* CTD (AmpR, StrR and KanR) | This study |
| WhiB2:σB | *E. coli* (BTH101) /  pKT25-*whiB2* and pUT18-*sigmaB* (AmpR, StrR and KanR) | This study |
| WhiB2:σH | *E. coli* (BTH101) /  pKT25-*whiB2* and pUT18-*sigmaH* (AmpR, StrR and KanR) | This study |
| WhiB2:σJ | *E. coli* (BTH101) /  pKT25-*whiB2* and pUT18-*sigmaJ* (AmpR, StrR and KanR) | This study |
| WhiB3:σA-CTD | *E. coli* (BTH101) /  pKT25-*whiB3* and pUT18-*sigmaA* CTD (AmpR, StrR and KanR) | This study |
| WhiB3:σB | *E. coli* (BTH101) /  pKT25-*whiB3* and pUT18-*sigmaB* (AmpR, StrR and KanR) | This study |
| WhiB3:σH | *E. coli* (BTH101) /  pKT25-*whiB3* and pUT18-*sigmaH* (AmpR, StrR and KanR) | This study |
| WhiB3:-σJ | *E. coli* (BTH101) /  pKT25-*whiB3* and pUT18-*sigmaJ* (AmpR, StrR and KanR) | This study |
| WhiB7:σA-CTD | *E. coli* (BTH101) /  pKT25-*whiB7* and pUT18-*sigmaA* CTD (AmpR, StrR and KanR) | This study |
| WhiB7:σB | *E. coli* (BTH101) /  pKT25-*whiB7* and pUT18-*sigmaB* (AmpR, StrR and KanR) | This study |
| WhiB7:σH | *E. coli* (BTH101) /  pKT25-*whiB7* and pUT18-*sigmaH* (AmpR, StrR and KanR) | This study |
| WhiB7:σJ | *E. coli* (BTH101) /  pKT25-*whiB7* and pUT18-*sigmaJ* (AmpR, StrR and KanR) | This study |
| Control positive | *E. coli* (BTH101) /  pKT25-zipand pUT18-zip (AmpR, StrR and KanR) | This study |
| Control negative | *E. coli* (BTH101) /  pKT25and pUT18 (AmpR, StrR and KanR) | This study |
